# Supplementary material
Source: PubMed Central journal article supplement (PMC3766730)
Supplement: NIHMS427098-supplement-1_si_001.pdf [file NIHMS427098-supplement-1_si_001.pdf]

Supplemental Material

**Characterization of mycobacterial PoID2 and PoID1 as RNA/DNA polymerases homologous to the POL domain of bacterial DNA ligase D**

Hui Zhu, Hitesh Bhattarai, Han Yan, Stewart Shuman, and Michael S. Glickman

Molecular Biology and Immunology Programs, Sloan-Kettering Institute, New York, NY 10065

Supplemental Tables S1 and S2

Supplemental Figures S1, S2, and S3

Table S1

## Prevalence of PoID1 and PoID2 in mycobacterial proteomes

| Species                                | PoID1 (aa) | PoID2 (aa) |
|----------------------------------------|------------|------------|
| <i>Mycobacterium abscessus</i>         | 342        | 409        |
| <i>Mycobacterium avium</i>             | 342        | 426        |
| <i>Mycobacterium colombiense</i>       | 343        | 422        |
| <i>Mycobacterium gilvum</i>            | 349        | 412        |
| <i>Mycobacterium intracellulare</i>    | 343        | 422        |
| <i>Mycobacterium kansasii</i>          | 345        | 416        |
| <i>Mycobacterium marinum</i>           | 346        | 420        |
| <i>Mycobacterium parascrofulaceum</i>  | 343        | 416        |
| <i>Mycobacterium phlei</i>             | 349        | 411        |
| <i>Mycobacterium rhodesiae</i>         | 349        | 411        |
| <i>Mycobacterium smegmatis</i>         | 350        | 426        |
| <i>Mycobacterium thermoresistibile</i> | 344        | 410        |
| <i>Mycobacterium tuberculosis</i>      | 346        | 397        |
| <i>Mycobacterium tusciae</i>           | 349        | 428        |
| <i>Mycobacterium ulcerans</i>          | 346        | 423        |
| <i>Mycobacterium vanbaalenii</i>       | 349        | 412        |
| <i>Mycobacterium xenopi</i>            | 358        | 413        |

Table S2

*Mycobacterium smegmatis* strains used in this study

| <b>Strain</b>                      | <b>Genotype</b>                                                                     | <b>Source</b> |
|------------------------------------|-------------------------------------------------------------------------------------|---------------|
| mc <sup>2</sup> 155<br>"wild-type" | <i>ept1</i>                                                                         | Ref. 30       |
| MGM 801                            | mc <sup>2</sup> 155 <i>ligD</i> -(D136A-D138A)                                      | Ref. 21       |
| MGM 843                            | $\Delta$ <i>polD1</i>                                                               | This study    |
| MGM 2027                           | mc <sup>2</sup> 155 $\Delta$ <i>polD2</i> :: <i>loxP</i> - <i>hyg</i> - <i>loxP</i> | This study    |
| MGM 2029                           | mc <sup>2</sup> 155 $\Delta$ <i>polD2</i> :: <i>loxP</i>                            | This study    |
| MGM 845                            | MGM801 $\Delta$ <i>polD1</i>                                                        | This study    |
| MGM 2028                           | MGM801 $\Delta$ <i>polD2</i> :: <i>loxP</i> - <i>hyg</i> - <i>loxP</i>              | This study    |
| MGM 2030                           | MGM801 $\Delta$ <i>polD2</i> :: <i>loxP</i>                                         | This study    |
| MGM 846                            | MGM 2030 $\Delta$ <i>polD1</i>                                                      | This study    |

|          |                                                                 |     |
|----------|-----------------------------------------------------------------|-----|
| MtuPolD1 | MAAAAEELDVDGIAVRLTSPDRMYFPKLG--SHGTKRRLVEYYFAVAGGPMLTALRDRPT    | 58  |
| MsmPolD1 | MASAAATELDVDGVKVRFTNPDKVYFPKLG--KNGTKGKLVVEYYLSVASGPMLALLRDRPV  | 59  |
| MtuPolD2 | MAAP-VSLDVHGRQVIVTHPGRVVFPANHNRKGYTKFDLVRYYLAVAEG-AMRGVAGRPM    | 61  |
| MsmPolD2 | MMAGALTLELDGLTVSVTNPKVIFPEYDGRAAVTKLDDLVNYYRAVADG-ALRGVFGSRPM   | 72  |
| PaeLigD  | ASAGASRAATAGVRISHPQRLIDPSIQ----ASKLELAEFHARYAD-LLLRDLRERPV      | 589 |
| MtuPolD1 | HLQRFDPDGVDGGEQIYQKRIPRHRPDYLQTCRVTFPSPGRMADALKVTHPAAIVWAAQMGTI | 118 |
| MsmPolD1 | HLQRFDPDGIEGEEIYQKRVPQKHPDYLETVCVTFPSPGRTADALKITHPSSIIWAAQMGTV  | 119 |
| MtuPolD2 | ILKRFVKGISAEAVFQKRAPANRPDWVDVAELHYASGRSAAEAVIHDAAGLAWVINLGCV    | 121 |
| MsmPolD2 | ILKRFVKGIATEAIFQKRAPEKRPDFIEVAELKYRSGTSAKEAVLRNTAGLAWAVNLGCV    | 132 |
| PaeLigD  | SLVRGPDGIGGELFFQKHAARLKI PGIVQLDPALDPGHP-PLLQIRSAEALVGAVQMGSI   | 648 |
| MtuPolD1 | TLHPWQVRCPDTEHPDELRI DLPQPGTGfVEARTVAVDVLRVLDLGLVGYPKTSGGR      | 178 |
| MsmPolD1 | TLHPWQVRCPDTEHPDELRV DLPQPGTGfKEARTVACDVLKPLLDELGLVGYPKTSGGR    | 179 |
| MtuPolD2 | DLNPHPVLAGDLHPDELRV DLPMPGVAWQRVVEVAL-VVREVLEDYGLTAWPKTSGSR     | 180 |
| MsmPolD2 | DLNPHPVRADDLHPDELRV DLPMPGVEWQQILDVAM-VAREVLSDHGLTAWPKTSGSR     | 191 |
| PaeLigD  | EFHTWNASLANLERPDRFVL DLPDPALPWKRMLE-ATQLSLTLLDELGLRAFLKTSGGK    | 707 |
| MtuPolD1 | GIHVFLRIATDWDfVEVRRAGIALAREVERRAPDAVTTSWWKEERGARIFIDFNQNARDR    | 238 |
| MsmPolD1 | GVHVFLRIKQWDFIEVRRAGIALAREVERRAPDAVTTSWWKEERGERLFI DYNQNARDR    | 239 |
| MtuPolD2 | GFHVYARIAPCWSFPQVRLAAQTVAREVERRLPDAATSRWWKEEREG-VFVDFNQNAKDR    | 239 |
| MsmPolD2 | GFHIYARISRDWPYAKVRLAAQTVAREVERRAPDLATAHWWKEEREG-VFVDFNQNAKDR    | 250 |
| PaeLigD  | GMHLLVPLERRHGWDEVKDFAQAISQHLARLMPERFSAVSGPRNRVKGKIFVDYLRNSRGA   | 767 |
| MtuPolD1 | TMASAYSVRPTPIATVSMPLTWEELAGADP-DDYTMTTVPELVKI--RDPWPAGMDDVAQ    | 295 |
| MsmPolD1 | TFASAYSVRKTPPIATVSMPLSWDELNRNADP-DDYTMTNTVPDLLAG--RDPWADIDSVQQ  | 296 |
| MtuPolD2 | TVASAYSVRATPDARVSTPLHWEEVPGCDP-AVFTMATVPSRLAD--IGDPWAGMDDAVG    | 296 |
| MsmPolD2 | TVASAYSVRATPDARVSTPLRWDEVPTCRP-EEFTIATVPDRFAE--IGDPWEGMDTAVG    | 307 |
| PaeLigD  | STVAAYSVRAREGLPVSVPVFFREELDSLQGANQWNLRSPLPQRLDELAGDDPWADYAGTRQ  | 828 |

Figure S1. **Mycobacterial PoID1 and PoID2 are homologous to the LigD POL domain.** The amino acid sequences of MtuPolD1, MsmPolD1, MtuPolD2 and MsmPolD2 are aligned to the homologous segment of the POL domain of *Pseudomonas aeruginosa* (Pae) LigD. Gaps in the alignment are denoted by -. Positions of side chain identity/similarity in all five proteins are denoted by •. The active site aspartate that was mutated to alanine in MsmPolD1 and MsmPolD2 is indicated by | above the alignment. Counterpart of amino acids in bacterial LigD that contact manganese or ATP are highlighted in yellow; amino acids that contact DNA are highlighted in cyan.

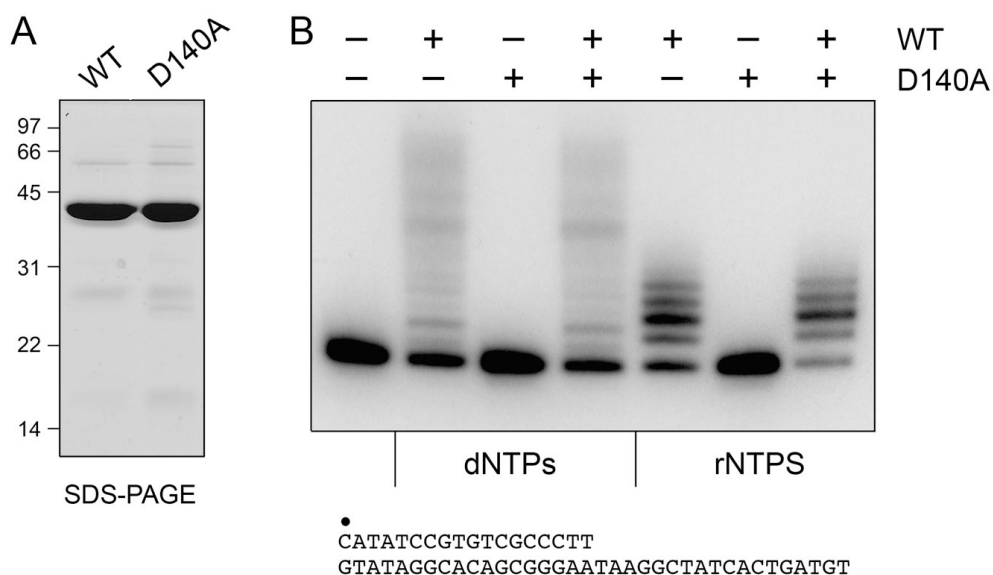

Figure S2. **Polymerase activity of recombinant MsmPolD1.** (A) Aliquots (5  $\mu$ g) of the phosphocellulose preparations of wild-type MsmPolD1 and mutant D140A were analyzed by SDS-PAGE. The Coomassie Blue-stained gel is shown. The positions and sizes (kDa) of marker polypeptides are indicated on the *left*. (B) Polymerase reaction mixtures (20  $\mu$ l) containing 50 mM Tris-HCl (pH 7.5), 1.25 mM  $\text{CoCl}_2$ , 1 pmol of  $^{32}\text{P}$ -labeled primer-template DNA substrate, 100  $\mu\text{M}$  each of dATP, dGTP, dCTP and dTTP (dNTPs) or 100  $\mu\text{M}$  each of ATP, GTP, CTP and UTP (rNTPs), and 400 ng of MsmPolD1 (WT or D140A, where indicated by +) were incubated for 10 min at 37°C. The products were resolved by PAGE and visualized by autoradiography.

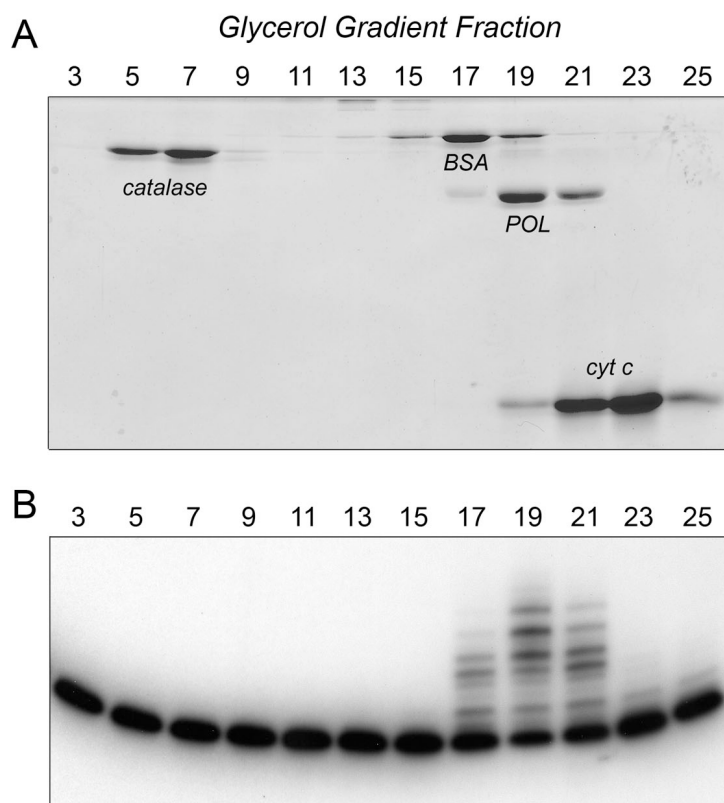

Figure S3. **MsmPold1 sediments as a monomer.** Glycerol gradient sedimentation of a mixture of MsmPold1, catalase, BSA and cytochrome c was performed as described under Experimental Procedures. (A) Aliquots (15  $\mu$ l) of the odd-numbered gradient fractions were analyzed by SDS-PAGE. The Coomassie Blue-stained gel is shown. (B) Polymerase reaction mixtures (20  $\mu$ l) containing 50 mM Tris-HCl (7.5), 1.25 mM  $\text{CoCl}_2$ , 1 pmol of  $^{32}\text{P}$ -labeled primer-template DNA substrate, 100  $\mu$ M each of dATP, dGTP, dCTP and dTTP, and 2  $\mu$ l of the odd-numbered gradient fractions were incubated for 10 min at 37°C. The reaction products were resolved by PAGE and visualized by autoradiography.
